# Supplementary material for: Biological effects of gamma-ray radiation on tulip (Tulipa gesneriana L.)
Source: PeerJ. 2022 Jan 19;10:e12792. doi: 10.7717/peerj.12792 (PMC8783560; doi:10.7717/peerj.12792)
Supplement: Supplemental Information 2 [file peerj-10-12792-s002.xlsx]

## Sheet: Sheet1
	Germination rates (%)					Survival rate (%)					Leaf area (cm2)
	Irradiation dose (Gy)	repeat 1	repeat 2	repeat 3		Irradiation dose (Gy)	repeat 1	repeat 2	repeat 3		Irradiation dose (Gy)	repeat 1	repeat 2	repeat 3
	0	83.33	90	86.67		0	90	93.33	90		0	137.4	125.8	132.4
	5	93.33	96.67	93.33		5	100	96.67	100		5	127.3	134.6	119.9
	10	86.67	93.33	90		10	96.67	93.33	96.67		10	123.6	110.4	116.7
	20	83.33	83.33	90		20	90	96.67	93.33		20	97.8	113.4	94.7
	40	86.67	83.33	83.33		40	86.67	90	86.67		40	83.9	80.7	86.7
	60	76.67	80	76.67		60	80	83.33	76.67		60	86.3	77.9	79.1
	80	63.33	60	73.33		80	53.33	50	56.67		80	80.3	77.8	76.8
	100	53.33	50	60		100	43.33	43.33	50		100	70.6	80.9	79.6
	Plant height (cm)					Petal number					Petal diameter (%)
	Irradiation dose (Gy)	repeat 1	repeat 2	repeat 3		Irradiation dose (Gy)	repeat 1	repeat 2	repeat 3		Irradiation dose (Gy)	repeat 1	repeat 2	repeat 3
	0	23.7	24.5	25.6		0	11	11	13		0	10.8	10.5	9.3
	5	24.8	26.8	24.9		5	11	13	11		5	10.3	9.5	9.6
	10	17.5	19.7	18.1		10	12	11	11		10	8.1	9.5	8.5
	20	16.1	13	14.6		20	11	11	9		20	6.6	7.5	8.1
	40	14.5	12.1	13.8		40	10	12	10		40	7.2	7.1	7.8
	60	14.1	12.3	13.1		60	9	7	9		60	6.9	5.8	6.3
	80	11.1	9.6	10.2		80	9	8	7		80	4.1	6.2	5.9
	100	10.1	8.8	9.7		100	7	8	7		100	5	6	5
	Anthocaulus length (cm)					Blooming rate (%)					Chlorophyll content ( mg·kg-1)
	Irradiation dose (Gy)	repeat 1	repeat 2	repeat 3		Irradiation dose (Gy)	repeat 1	repeat 2	repeat 3		Irradiation dose (Gy)	repeat 1	repeat 2	repeat 3
	0	25.8	22	23.7		0	76.67	83.33	83.33		0	0.96	0.82	0.96
	5	22.3	24.8	23.1		5	93.33	90	93.33		5	0.99	0.87	0.96
	10	21.9	18.8	19.8		10	63.33	73.33	63.33		10	0.95	0.82	0.94
	20	15.8	13.2	14.6		20	46.67	43.33	36.67		20	0.88	0.8	0.87
	40	13.9	12.4	13.1		40	26.67	33.33	30		40	0.81	0.69	0.75
	60	11.2	9.7	10.3		60	23.33	26.67	26.67		60	0.7	0.63	0.63
	80	7.9	7.2	7.3		80	13.33	13.33	20		80	0.63	0.5	0.57
	100	7.8	6.6	6.8		100	66.67	63.33	70		100	0.58	0.47	0.52
	Malondialdehyde (MDA) content (nmol·kg−1)
	Irradiation dose (day)	repeat 1	repeat 2	repeat 3
	CK	31.74	25.1	28.19
	5 Gy	29.66	26.01	27.02
	10 Gy	31.69	25.36	31.56
	20 Gy	33.69	26.83	30.99
	40 Gy	36.36	29.79	34.53
	60 Gy	35.83	45.02	37.78
	80 Gy	58.15	45.36	52.51
	100 Gy	66.91	52.23	56.55
